# A novel cortical target to enhance hand motor output in humans with spinal cord injury

Jinyi Long,\* Paolo Federico\* and Monica A. Perez

\*These authors contributed equally to this work.

A main goal of rehabilitation strategies in humans with spinal cord injury is to strengthen transmission in spared neural networks. Although neuromodulatory strategies have targeted different sites within the central nervous system to restore motor function following spinal cord injury, the role of cortical targets remain poorly understood. Here, we use 180 pairs of transcranial magnetic stimulation for ~30 min over the hand representation of the motor cortex at an interstimulus interval mimicking the rhythmicity of descending late indirect (I) waves in corticospinal neurons (4.3 ms; I-wave protocol) or at an interstimulus interval in-between I-waves (3.5 ms; control protocol) on separate days in a randomized order. Late I-waves are thought to arise from trans-synaptic cortical inputs and have a crucial role in the recruitment of spinal motor neurons following spinal cord injury. Motor evoked potentials elicited by transcranial magnetic stimulation, paired-pulse intracortical inhibition, spinal motor neuron excitability (F-waves), index finger abduction force and electromyographic activity as well as a hand dexterity task were measured before and after both protocols in 15 individuals with chronic incomplete cervical spinal cord injury and 17 uninjured participants. We found that motor evoked potentials size increased in spinal cord injury and uninjured participants after the I-wave but not the control protocol for ~30 to 60 min after the stimulation. Intracortical inhibition decreased and F-wave amplitude and persistence increased after the I-wave but not the control protocol, suggesting that cortical and subcortical networks contributed to changes in corticospinal excitability. Importantly, hand motor output and hand dexterity increased in individuals with spinal cord injury after the I-wave protocol. These results provide the first evidence that late synaptic input to corticospinal neurons may represent a novel therapeutic target for improving motor function in humans with paralysis due to spinal cord injury.

Department of Neurological Surgery, The Miami Project to Cure Paralysis, University of Miami, Bruce W. Carter Department of Veterans Affairs Medical Center, Miami, FL, USA

Correspondence to: Monica A. Perez, PhD.  
Department of Neurological Surgery  
The Miami Project to Cure Paralysis  
University of Miami,  
Bruce W. Carter Department of Veterans Affairs Medical Center,  
Miami, FL, USA  
E-mail: perezmo@miami.edu

**Keywords:** spinal cord injury; plasticity; motor function; motor recovery; cortical mechanisms

**Abbreviations:** MEP = motor evoked potential; MVC = maximal voluntary contraction; SCI = spinal cord injury; SICF = short-interval intracortical facilitation; SICI = short-interval intracortical inhibition; TMS = transcranial magnetic stimulation

## Introduction

Treatments in spinal cord injury (SCI) result in limited behavioural improvements, highlighting the need to develop new

methodologies to strengthen spared neural networks. During the past decade, neuromodulatory therapies in humans with SCI have commonly used electrical stimulation of the spinal cord (Gerasimenko *et al.*, 2007; Harkema *et al.*, 2011;

Received November 5, 2016. Revised February 25, 2017. Accepted March 4, 2017.

© The Author (2017). Published by Oxford University Press on behalf of the Guarantors of Brain. All rights reserved.

For Permissions, please email: journals.permissions@oup.com

Angeli *et al.*, 2014), operant conditioning of spinal reflexes (Thompson *et al.*, 2013), spike-timing dependent plasticity protocols targeting synaptic interactions between corticospinal neurons and spinal motor neurons (Bunday and Perez, 2012) and stimulation of the motor cortex (Tazoe and Perez, 2015), alone or in combination with training, to promote functional recovery. Although these approaches have resulted in improvements in voluntary motor output and other related body functions, it is clear that the improvements are limited and there is a need to develop novel mechanistic-based interventions.

After SCI, synaptic transmission and organization of neural networks not only change in the spinal cord but also in higher order structures such as the motor cortex (Oudega and Perez, 2012). For example, animal models of SCI showed that cortical deafferentation results in layer-specific synaptic pruning and expansive reorganization (Kim *et al.*, 2006; Ghosh *et al.*, 2010). Humans with SCI show altered transmission in cortical circuits (Nardone *et al.*, 2015; Cirillo *et al.*, 2016) and expansion of residual motor cortical representations compared with uninjured subjects (Moxon *et al.*, 2014). Cortical synaptic inputs to

corticospinal neurons contribute to different forms of motor behaviour and learning in animals and humans (Sanes and Donoghue, 2000; Graziano and Aflalo, 2007). Also, increases in the efficacy of cortical synaptic connections to corticospinal neurons has been shown to enhance transmission in the corticospinal pathway and voluntary motor output in uninjured individuals and in people with motor disorders such as stroke (Thickbroom *et al.*, 2006; Ridding and Rothwell, 2007). A critical question is if neuromodulatory therapies targeting cortical networks could be advantageous to strengthen voluntary motor output following SCI.

In humans, we can obtain information about cortical networks by recording the effects of cortical stimulation. Recordings from the epidural space showed that a single pulse of transcranial magnetic stimulation (TMS) over the motor cortex evokes a series of temporarily synchronized descending waves in the corticospinal tract (Di Lazzaro and Rothwell, 2014). The shortest wave is due to direct stimulation of the corticospinal neuron at or near the initial segment (D-wave) and succeeding indirect (I) waves with a periodicity of  $\sim 1.5$  ms (Fig. 1A) and a discharge frequency

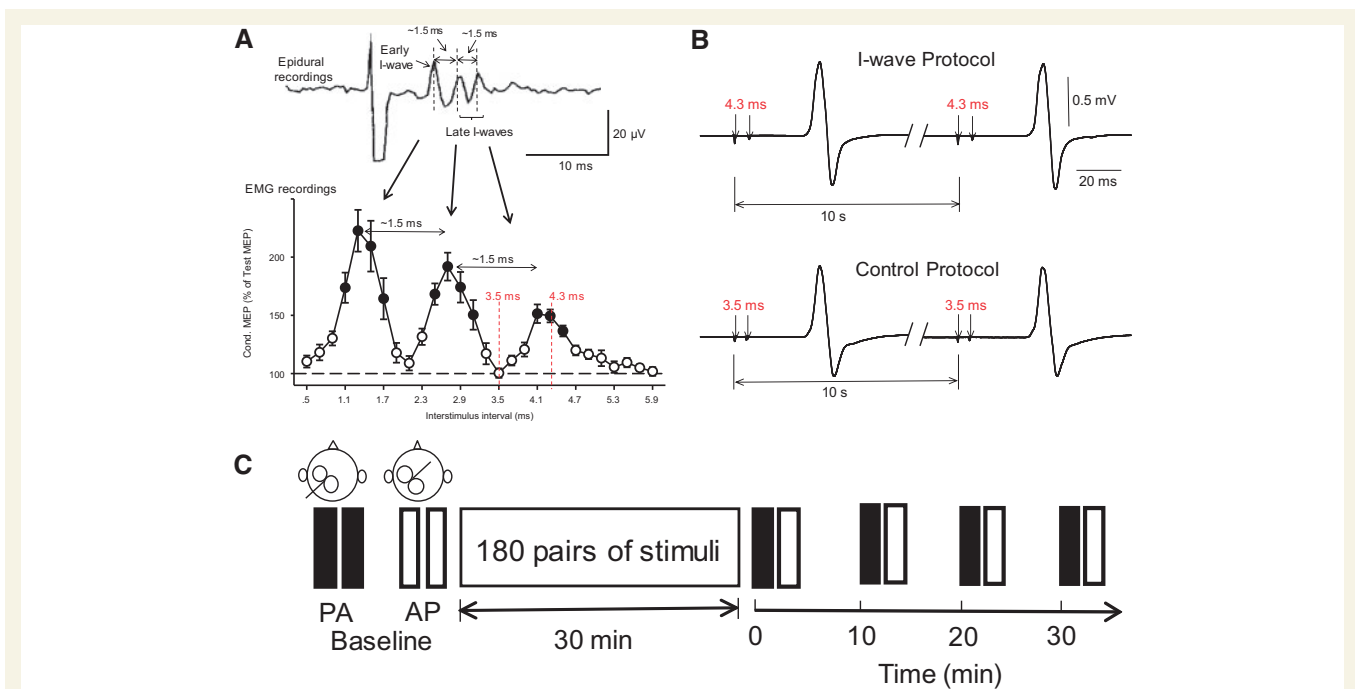

**Figure 1 Experimental set-up.** (A) Upper trace shows early and late descending indirect (I) waves on corticospinal volleys recorded from the cervical epidural space after a single TMS pulse with a periodicity of  $\sim 1.5$  ms. The earliest wave due to direct stimulation of the corticospinal neuron at or near the initial segment (D-wave) is not shown in the diagram. In the graph, the abscissa shows the interstimulus interval between pairs of TMS pulses (0.5–5.9 ms, in 0.2-ms steps) and the ordinate shows the size of a conditioned MEP (expressed as a percentage of a test MEP, horizontal dashed line) recorded by surface EMG from the first dorsal interosseous muscle. MEPs were enhanced at interstimulus intervals corresponding to the I-waves recorded from epidural recordings. (B) Conditioned MEPs recorded from a representative subject by using pairs of TMS pulses delivered at an interstimulus interval of 4.3 ms (I-wave protocol; top) and 3.5 ms (control protocol; bottom) at an intertrial interval of 10 s. Note that at 4.3 ms MEPs are facilitated mimicking the peak of a late I-wave and at 3.5 ms MEPs are not facilitated corresponding to an interval in-between the I-waves (see red dotted lines in the graph on the left; modified from Cirillo *et al.*, 2016). (C) Two sets of 20 MEPs were recorded with the coil in the posterior-anterior (PA) and anterior-posterior (AP) orientation, before (baseline) and after (0, 10, 20, and 30 min) receiving 180 pairs of pulses in each protocol.

of ~670 Hz are thought to arise from trans-synaptic activation of corticospinal neurons by intracortical circuits (Di Lazzaro *et al.*, 2012). Evidence suggests that the early I-wave arises from depolarization of pyramidal neurons in deeper areas close to the axon initial segment (Sakai *et al.*, 1997), while late I-waves reflect transmission from GABAergic intracortical circuits (Di Lazzaro *et al.*, 2008; Paulus *et al.*, 2008). Late I-waves measured by a paired-pulse TMS paradigm are impaired in humans with SCI and these changes correlated with deficits in voluntary motor output (Cirillo *et al.*, 2016). Importantly, transmission in these late cortical circuits plays a crucial role in the recruitment of spinal motor neurons in humans and in particular, after SCI (Thickbroom *et al.*, 2006; Cirillo *et al.*, 2016). Thus, we hypothesized that the strengthening of late I-wave volleys in corticospinal neurons will support improvements in voluntary hand motor output in humans with chronic cervical incomplete SCI.

## Materials and methods

### Subjects

Fifteen subjects with SCI (mean age = 44.0 ± 15.3 years, four females) and 17 right-handed age-matched uninjured subjects (mean age = 37.3 ± 12.3,  $P = 0.23$ ; five females) participated in the study. All subjects gave written informed consent prior to participation in the study, which was approved by the local ethics committee at the University of Miami. The study was performed in accordance with the Declaration of Helsinki. Subjects with SCI were categorized by the American Spinal Cord Injury Association Impairment Scale (AIS) as AIS C or D, had a chronic (>1 year), cervical injury (C2–C7), and residual sensory and motor hand and arm motor function (Table 1). Maximal voluntary contraction (MVC) isometric

forces into index finger abduction were larger in uninjured compared with SCI subjects (uninjured = 27.3 ± 7.3 N, SCI = 14.8 ± 6.1 N,  $P < 0.001$ ; Table 1).

### EMG recordings

Surface EMG was recorded at rest from the first dorsal interosseous muscle of the right hand in uninjured subjects and from the more affected hand in individuals with SCI using Ag-AgCl surface electrodes (10 mm diameters). The signals were amplified, filtered (30–2000 Hz), and sampled at 2 kHz for off-line analysis (CED 1401 with Signal software, Cambridge Electronic Design). During MVC, force exerted at the proximal interphalangeal joint of the index finger was measured by load cells (Honeywell, Ltd., range ± 498.1 N, voltage ± 5 V, high-sensitivity transducer 0.045 V/N). Force was sampled at 200 Hz and stored on a computer for off-line analysis.

### Transcranial magnetic stimulation

Transcranial magnetic stimuli were applied using a figure-of-eight coil (loop diameter 70 mm) through a Magstim 200<sup>2</sup> magnetic stimulator (Magstim) with a monophasic current waveform. TMS was used to activate different sets of synaptic input to corticospinal neurons by changing the current flow across the hand area of the motor cortex (Di Lazzaro *et al.*, 2012). We used a posterior–anterior (PA, coil handle 45° to the midline) and anterior–posterior (AP, coil handle 180° relative to PA) coil orientations to preferentially evoke volleys with characteristics resembling early and late I-waves, respectively. Note that currents flowing from PA across the central sulcus preferentially evoke highly synchronized corticospinal activity consistent with early I-waves whereas currents flowing from AP preferentially evoke less synchronized and, in some cases, delayed corticospinal activity consistent with late I-waves (Di Lazzaro *et al.*, 2012; Di Lazzaro and Rothwell, 2014). The coil was placed at the optimal scalp position for eliciting a motor

**Table 1** Spinal cord injury participants

| SCI subject | Age, years | Gender | Level          | AIS score | Aetiology | Time, years | Index finger abduction MVC (N) |
|-------------|------------|--------|----------------|-----------|-----------|-------------|--------------------------------|
| 1           | 37         | M      | C <sub>7</sub> | D         | T         | 9           | 14.2                           |
| 2           | 42         | F      | C <sub>3</sub> | C         | T         | 8           | 21.1                           |
| 3           | 68         | M      | C <sub>3</sub> | D         | T         | 13          | 9.1                            |
| 4           | 35         | M      | C <sub>7</sub> | C         | T         | 2           | 7.8                            |
| 5           | 36         | M      | C <sub>2</sub> | C         | T         | 13          | 18.4                           |
| 6           | 49         | F      | C <sub>2</sub> | C         | T         | 9           | 10.7                           |
| 7           | 30         | M      | C <sub>3</sub> | C         | T         | 9           | 24.9                           |
| 8           | 67         | M      | C <sub>2</sub> | D         | T         | 6           | 19.1                           |
| 9           | 50         | M      | C <sub>3</sub> | C         | T         | 12          | 10.8                           |
| 10          | 19         | M      | C <sub>2</sub> | D         | T         | 3           | 8.2                            |
| 11          | 51         | F      | C <sub>5</sub> | C         | T         | 14          | 22.6                           |
| 12          | 64         | M      | C <sub>5</sub> | C         | T         | 5           | 15.1                           |
| 13          | 48         | M      | C <sub>4</sub> | C         | T         | 4           | 12.3                           |
| 14          | 21         | M      | C <sub>6</sub> | C         | T         | 2           | 16.8                           |
| 15          | 47         | F      | C <sub>5</sub> | C         | T         | 4           | 10.9                           |

AIS = American Spinal Cord Injury Association Impairments Scale; M = Male; F = Female; T = traumatic; N = Newtons (uninjured = 27.3 ± 7.3, SCI = 14.8 ± 6.4).

evoked potential (MEP) in the contralateral first dorsal interosseous muscle for the PA induced current and this position was then marked as the hotspot also for the AP orientation. The TMS coil was held to the head of the subject with a custom coil holder, while the head was firmly secured to a headrest by straps to limit head movements.

## I-wave and control protocol

During testing, participants were seated in a customized armchair with both arms flexed at the elbow by 90°, the forearm pronated and the wrist restrained by straps. Subjects participated in two stimulation protocols separated by 3–5 days in a randomized order. In each protocol, we applied 180 pairs of stimuli for ~30 min over the hand representation of the motor cortex at an interstimulus interval targeting late I-waves in corticospinal neurons (I-wave protocol) or at an interstimulus interval in-between I-waves (control protocol). The I-wave protocol was based on a paired-pulse TMS paradigm where a conditioning stimulus (S2) was delivered after a test stimulus (S1) at a 4.3 ms interstimulus interval with the coil in the PA orientation (Tokimura *et al.*, 1996; Ziemann *et al.*, 1998a). We ensured that all subjects showed I-wave facilitation at this interval at baseline. The S1 intensity was set at 120% of the resting motor threshold and the S2 was set at 90% of the resting motor threshold. In the control protocol, the S2 was given 3.5 ms after the S1 to target an interval in-between I-waves (Fig. 1B). Although the same stimulus intensity was used in both protocols the size of MEPs elicited by the combined S1 and S2 progressively increased during the I-wave but not the control protocol, highlighting the specificity of these approaches. MEP peak-to-peak amplitude and onset latency dispersion tested with the coil in the PA and AP orientation, voluntary motor output and hand dexterity were measured before (baseline), immediately after (0), and 10, 20, and 30 min after the I-wave protocol and the control protocol (Fig. 1C). To further understand the mechanisms contributing to changes in MEP outcomes present after the I-wave protocol short-interval intracortical inhibition (SICI), short-interval intracortical facilitation (SICF), and F-waves (amplitude and persistence) were measured at similar time as described above.

## Motor evoked potentials

Resting motor threshold was determined at the minimum stimulus intensity required to elicit MEP > 50  $\mu$ V peak-to-peak amplitude above the background EMG activity in at least 5 of 10 consecutive trials in the relaxed first dorsal interosseous muscle. Resting motor threshold was higher in SCI compared with uninjured subjects [ $F(1,25) = 6.6$ ,  $P = 0.017$ ] when the coil was in the AP (uninjured =  $63.9 \pm 13.6\%$ , SCI =  $74.0 \pm 10.8\%$  of stimulator output) and PA (uninjured =  $49.0 \pm 10.7\%$ , SCI =  $62.1 \pm 12.4\%$  of stimulator output) orientation [ $F(1,25) = 161.5$ ,  $P < 0.001$ ]. TMS intensity was set at 120% of the resting motor threshold. A total of 20 MEPs were recorded at each time point before and after each protocol, using PA and AP induced currents in uninjured ( $n = 17$ ) and SCI ( $n = 15$ ) participants. At baseline, the size of MEPs elicited with the coil in the PA and AP orientation we maintained similar in uninjured (PA =  $1.2 \pm 0.2$  mV, AP =  $1.3 \pm 0.2$  mV;  $P = 0.9$ ) and SCI (PA =  $0.4 \pm 0.2$  mV, AP =  $0.3 \pm 0.1$  mV;  $P = 0.2$ ) participants for the different coil

orientations tested. As MEPs were larger in uninjured compared with SCI participants the analysis was also conducted in a subgroup of SCI individuals ( $n = 8$ ) in whom MEPs were similar across groups. We measured the MEP onset latency dispersion before and after each protocol in each coil orientation by subtracting the mean MEP onset latency from individual MEPs onset latency in each condition. In a subset of subjects the effects of the stimulation were followed up until measurements returned to baseline.

## Short-interval intracortical inhibition

SICI was tested using a previously described paired-pulse paradigm (Kujirai *et al.*, 1993) in uninjured ( $n = 10$ ) and SCI ( $n = 9$ ) participants before and after the I-wave protocol with the coil in the AP and PA orientation. An S2 was set at an intensity of ~70% of resting motor threshold (uninjured =  $73.5 \pm 8.9\%$ , SCI =  $71.2 \pm 10.3\%$  of resting motor threshold;  $P = 0.73$ ) and an S1 was set at 120% of resting motor threshold in both groups. The S2 was delivered 2 ms before S1. Previous evidence showed that the size of a test MEP can affect the magnitude of SICI. Because MEP size in the AP orientation increased after the I-wave protocol compared with baseline we also tested SICI by adjusting the test MEP size to match MEP amplitudes produced at baseline. SICI was calculated by expressing the size of conditioned MEP as a percentage of the test MEP size [(conditioned MEP  $\times$  100)/(test MEP)]. Twenty test MEPs and 20 conditioned MEPs were recorded at each time point.

## Short-interval intracortical facilitation

We used a previously described paired-pulse paradigm (Tokimura *et al.*, 1996; Ziemann *et al.*, 1998a; uninjured,  $n = 10$  and SCI,  $n = 10$ ) to test SIFC before and after the I-wave protocol. An S2 was delivered 1.3 ms after an S1 with the coil in the PA and AP orientation. The intensity of the S1 was set at 120% of resting motor threshold and for the S2 at 90% of resting motor threshold. Since MEP size in AP orientation was increased after I-wave protocol compared to baseline, here we also tested SICF by adjusting the S1 MEP size to match MEP amplitudes produced at baseline. SICF was calculated by expressing the size of conditioned MEP as a percentage of the test MEP size [(conditioned MEP  $\times$  100)/(test MEP)]. A total of 20 test and 20 conditioned MEPs were recorded at each time point.

## F-waves

Motor neuron excitability (reflected by changes in F-wave amplitude and persistence) was measured in both groups (uninjured,  $n = 10$ ; SCI,  $n = 10$ ) using supramaximum stimulus intensity to the ulnar nerve at the wrist (200  $\mu$ s pulse duration, DS7A; Digitimer) with monopolar bar electrodes before and after the I-wave protocol. The anode and cathode were 3 cm apart and 1 cm in diameter with the cathode positioned proximally. The stimuli were delivered at 1 Hz at an intensity of 150% of the M-max. For each trial, we quantified for each F-wave the peak-to-peak amplitude (expressed relative to the M-max) and F-wave persistence (the percentage of stimuli



evoking a response; McNeil *et al.*, 2013). If the F-wave was not present, an amplitude of zero was included in the mean (Butler and Thomas, 2003). The same result was observed in both groups whether zero F-wave amplitudes were included in the analysis or not. Three sets of 30 F-waves were recorded before and after each time point in the I-wave protocol.

## Motor output

Individuals were instructed to perform sets of 20 brief, fast, isometric voluntary contractions into index finger abduction by moving a cursor on a computer screen into a target line representing 10% of MVC (uninjured,  $n = 10$ ; SCI,  $n = 10$ ). The index finger was attached to a custom two-axis load cell (Honeywell Ltd.), which measured finger abduction force. At the start of the experiment, subjects performed three brief MVCs (3–5 s) into index finger abduction separated by 30 s. The maximal forces were used to set targets for subsequent submaximal contractions of around 10% of MVC. Subjects were able to control movement of the cursor up to 8% of MVC and the rest of the displacement (2% of MVC) was simulated by a LabVIEW program. This allowed subjects to rely on their internal calibration and not to make conscious corrections of the voluntary output exerted. Four sets of 20 trials were repeated before and after each protocol. Force and mean rectified EMG in the first dorsal interosseous muscle, which contributes to index finger abduction, were analysed in a 250 ms window during each trial using Spike2 (Bunday and Perez, 2012). We examined motor output steadiness by measuring the coefficient of variation (CV) of the rectified EMG [standard deviation (SD)/mean EMG] and force amplitude (SD/mean force amplitude). We also calculated reaction times as the time point after the auditory signal at which EMG activity exceeded  $\pm 4$  SD of the mean average rectified EMG, measured 100 ms before stimulus artefact.

## Nine-hole peg test

During testing, participants with SCI ( $n = 10$ ) were seated in front of a table where the apparatus used for the nine-hole peg test was located. The distance and position between each subject's hand and the apparatus was recorded and maintained constant across time. Subjects were instructed to pick up nine pins and position each one of them into a reservoir as fast and accurately as possible. A stopwatch was used to measure the time to execute the task. Time was recorded separately for the in and out components of the task. After familiarization, participants were asked to repeat the task five times before and after each protocol.

## Data analysis

Normal distribution was tested by the Shapiro-Wilk test and the Mauchly test was used to test sphericity. When normal distribution could not be assumed data were log transformed. When sphericity could not be assumed the Greenhouse-Geisser correction statistic was used. Repeated measures ANOVAs were performed to determine the effect of Protocol (I-wave, control), Time (Baseline, 0, 10, 20, 30 min), Coil orientation (PA, AP) and Group (uninjured, SCI) on MEP size, and MEP onset latency dispersion. Repeated measures ANOVAs were also performed to determine the effect of Time, Group and

Coil orientation on SICI and SICF and the effect of Time and Group on F-wave amplitude and persistence. Bonferroni *post hoc* tests were used to check for significant comparisons. The significant level was set at  $P < 0.05$  and group data are presented as mean  $\pm$  SD in the text and figures.

## Results

### Motor evoked potentials

Figure 2A and C illustrates MEP traces recorded from the first dorsal interosseous muscle at rest in a representative uninjured and SCI subject with the TMS coil in the AP orientation. Note that MEPs increased in size in both subjects after the I-wave but not the control protocol for 30 min.

Repeated measures ANOVA showed a significant effect of Protocol [ $F(1,520) = 5.5$ ,  $P = 0.02$ ], Time [ $F(4,520) = 4.5$ ,  $P = 0.002$ ], Coil orientation [ $F(1,520) = 4.6$ ,  $P = 0.03$ ], Group [ $F(1,520) = 20.6$ ,  $P < 0.001$ ], but not in their interaction [ $F(4,520) = 0.56$ ,  $P = 0.81$ ] on MEP size. *Post hoc* testing showed that MEPs in the AP orientation increased in uninjured (by  $69.7 \pm 19.9\%$ , 15/17,  $P < 0.001$ ; Fig. 2B) and SCI (by  $42.3 \pm 13.2\%$ , 14/15,  $P < 0.001$ ; Fig. 2D) participants compared with baseline for 30 min. Note that MEPs in the AP orientation also increased after the I-wave protocol in SCI subjects in whom MEP size at baseline was similar to uninjured participants. We followed up the effects of the I-wave protocol and found out that MEP size returned to baseline  $\sim 30$ –110 min after the stimulation (mean =  $54.3 \pm 30.1$  min,  $n = 8$ ). Also note that MEPs elicited with the coil in the PA orientation remained unchanged after the I-wave (uninjured,  $P = 0.39$ , SCI,  $P = 0.52$ ) and control (uninjured,  $P = 0.62$ , SCI,  $P = 0.83$ ; Supplementary Fig. 1) protocol in both groups.

Repeated measures ANOVA also showed a significant effect of Protocol [ $F(1,520) = 4.9$ ,  $P = 0.02$ ], Time [ $F(4,520) = 20.8$ ,  $P < 0.001$ ], Coil orientation [ $F(1,520) = 31.7$ ,  $P < 0.001$ ] but not Group [ $F(1,520) = 1.4$ ,  $P = 0.24$ ] and in their interaction [ $F(4,520) = 0.43$ ,  $P = 0.51$ ] on MEP onset latency dispersion. The latency dispersion was larger for MEPs in the AP (uninjured =  $0.76 \pm 0.12$  ms, SCI =  $0.89 \pm 0.32$  ms;  $P < 0.001$ ) compared with the PA (uninjured =  $0.54 \pm 0.11$  ms, SCI =  $0.62 \pm 0.18$  ms;  $P < 0.001$ ) orientation in both groups (Fig. 3A and C, see raw traces). This is consistent with previous results showing that PA currents preferentially evoke highly synchronized corticospinal activity while AP currents evoke less synchronized and, in some cases, delayed corticospinal activity consistent with late I-waves (Di Lazzaro *et al.*, 2012; Di Lazzaro and Rothwell, 2014). *Post hoc* testing showed that after the I-wave protocol the latency dispersion decreased in uninjured (by  $0.18 \pm 0.03$  ms, 13/17,  $P < 0.001$ ; Fig. 3B) and SCI (by  $0.24 \pm 0.02$  ms, 13/15,  $P < 0.001$ ; Fig. 3D) participants for AP MEPs. Note that latency dispersion for MEPs in the AP orientation also decreased after the I-wave protocol in

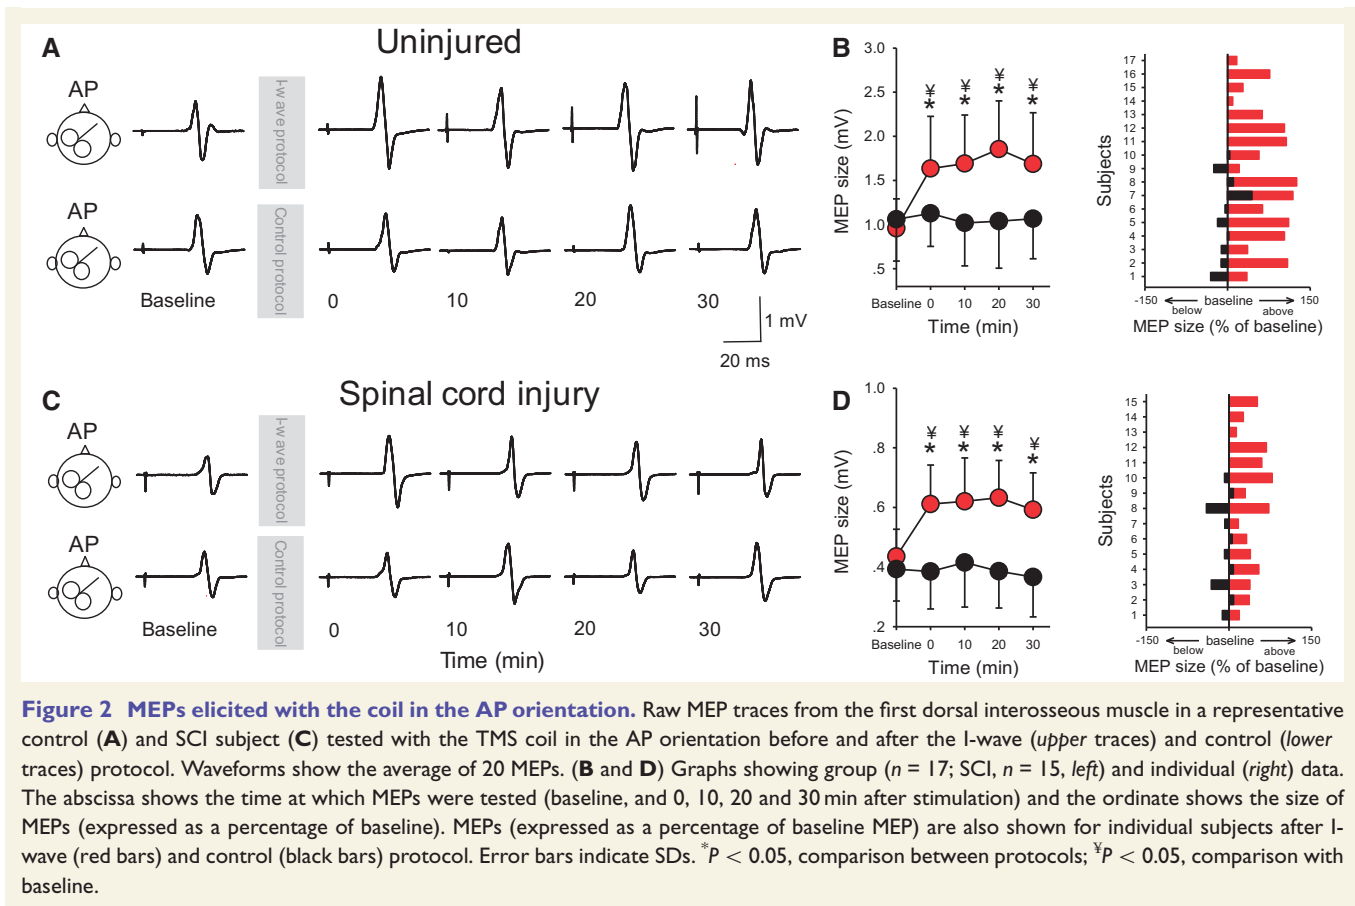

**Figure 2** MEPs elicited with the coil in the AP orientation. Raw MEP traces from the first dorsal interosseous muscle in a representative control (A) and SCI subject (C) tested with the TMS coil in the AP orientation before and after the I-wave (upper traces) and control (lower traces) protocol. Waveforms show the average of 20 MEPs. (B and D) Graphs showing group ( $n = 17$ ; SCI,  $n = 15$ , left) and individual (right) data. The abscissa shows the time at which MEPs were tested (baseline, and 0, 10, 20 and 30 min after stimulation) and the ordinate shows the size of MEPs (expressed as a percentage of baseline). MEPs (expressed as a percentage of baseline MEP) are also shown for individual subjects after I-wave (red bars) and control (black bars) protocol. Error bars indicate SDs. \* $P < 0.05$ , comparison between protocols; † $P < 0.05$ , comparison with baseline.

SCI subjects in whom MEP size at baseline was similar to uninjured participants ( $P = 0.003$ ). No changes were found in latency dispersion on MEPs elicited in the PA orientation after the I-wave (uninjured,  $P = 0.59$ , SCI,  $P = 0.68$ ) and the control (uninjured,  $P = 0.75$ , SCI,  $P = 0.78$ ; Fig. 3B and D) protocol in both groups.

## Short-interval intracortical inhibition and short-interval intracortical facilitation

Figure 4A illustrates examples of test (black traces) and conditioned (grey traces) MEPs recorded from the first dorsal interosseous muscle while testing SICI in representative subjects. Repeated measures ANOVA showed an effect of Time [ $F(4,190) = 6.2$ ,  $P < 0.001$ ], Coil orientation [ $F(1,190) = 101.9$ ,  $P < 0.001$ ] but not Group [ $F(1,190) = 1.8$ ,  $P = 0.19$ ] and in their interaction [ $F(4,190) = 0.34$ ,  $P = 0.94$ ] on SICI. SICI decreased after the I-wave protocol in uninjured (by  $33.2 \pm 5.2\%$ , 9/10,  $P < 0.001$ ) and SCI (by  $28.7 \pm 7.1\%$ , 8/9,  $P < 0.001$ ; Fig. 4B) participants for 30 min. Similar results were observed when SICI was tested by adjusting the size of the test MEPs to match the MEP amplitudes produced at baseline (SICI decreased by  $25.6 \pm 6.3\%$  in uninjured,  $P < 0.001$  and by  $23.8 \pm 5.7\%$  in SCI subjects,  $P < 0.001$ ).

Repeated measures ANOVA also showed an effect of Time [ $F(4,200) = 6.1$ ,  $P < 0.001$ ], Coil orientation [ $F(1,200) = 102.8$ ,  $P < 0.001$ ] but not Group [ $F(1,200) = 2.2$ ,  $P = 0.14$ ] and in their interaction [ $F(4,200) = 0.55$ ,  $P = 0.69$ ] on SICF. We found that SICF increased in uninjured (by  $20.2 \pm 3.1\%$ , 10/10,  $P < 0.001$ ) and in SCI ( $P < 0.001$ ; 9/10, Fig. 4D) participants compared with baseline for 30 min. The same results were obtained when we adjusted the size of the test MEP to match the size of the test MEP at baseline (SICF increased by  $22.6 \pm 4.3\%$  in uninjured,  $P < 0.01$  and by  $18.6 \pm 3.9\%$  in SCI subjects,  $P < 0.001$ ).

## F-waves

Consistent with previous results, we found that at baseline the F-wave amplitude was larger in SCI ( $1.93 \pm 0.82\%$  of M-max) compared with uninjured ( $0.85 \pm 0.32\%$  of M-max;  $P < 0.01$ ) participants while F-wave persistence remained similar across groups (uninjured =  $67.8 \pm 10.6\%$  and SCI =  $75.3 \pm 12.4\%$ ;  $P = 0.7$ ). Repeated measures ANOVA showed an effect of Time [ $F(4,99) = 10.1$ ,  $P < 0.001$ ], Group [ $F(1,99) = 10.9$ ,  $P = 0.005$ ] and in their interaction [ $F(4,99) = 2.9$ ,  $P = 0.03$ ] on F-wave amplitude. After the I-wave protocol, F-wave amplitude increased in uninjured (by  $19.4 \pm 3.5\%$ , 9/10,  $P < 0.001$ ; Fig. 5A and B) and SCI (by  $28.2 \pm 5.1\%$ , 8/10,  $P < 0.001$ ;

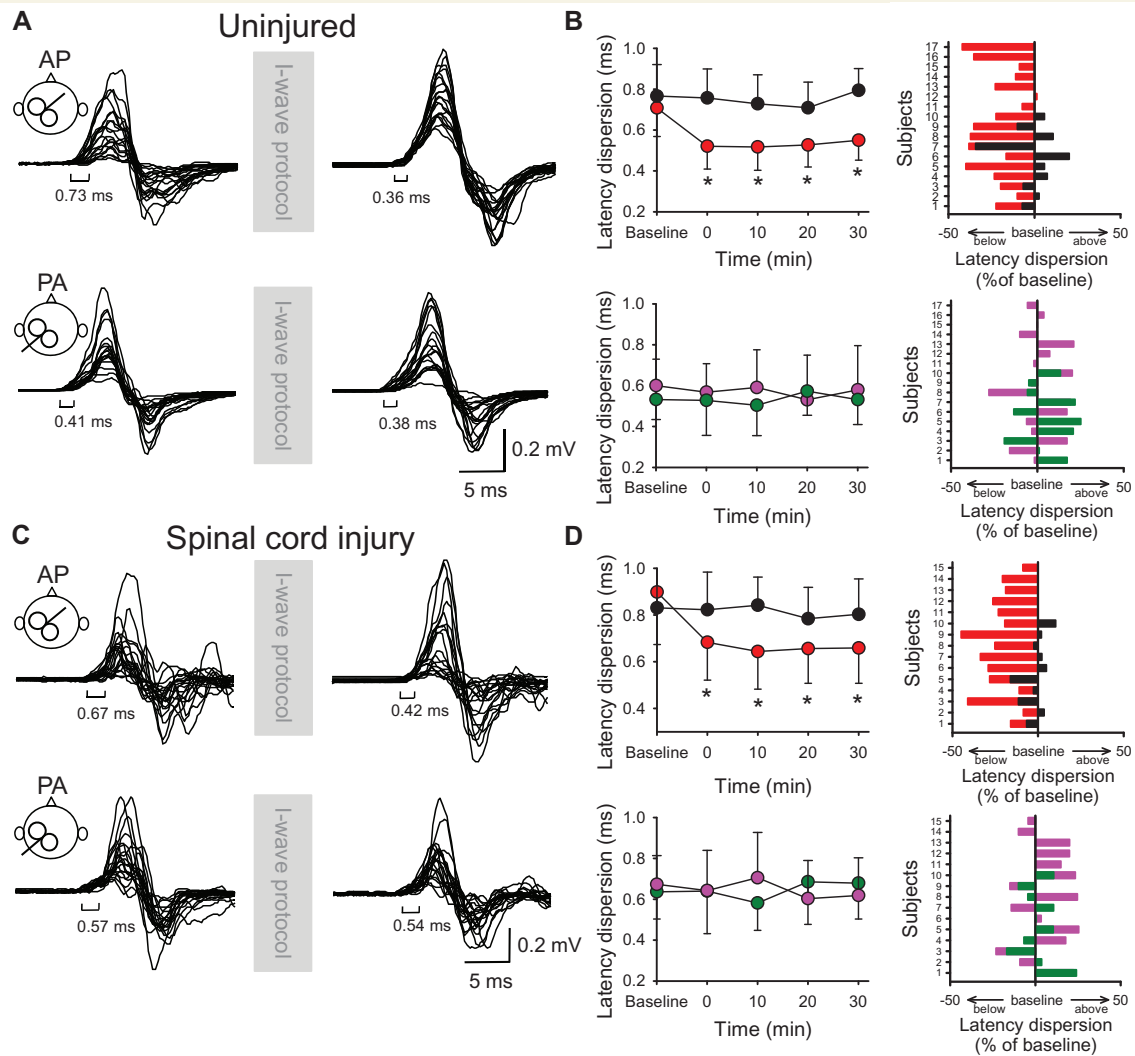

**Figure 3 MEP onset latency dispersion.** Raw MEP traces from the first dorsal interosseus muscle for a representative uninjured (**A**) and SCI subject (**C**) tested with the coil in the AP (*upper*) and PA (*lower*) orientation before and after the I-wave protocol. Twenty superimposed MEPs are shown in each condition. (**B** and **D**) Graphs showing group ( $n = 17$ ; SCI,  $n = 15$ , *left*) and individual (*right*) data. The abscissa shows the time at which MEPs were tested (baseline, and 0, 10, 20 and 30 min after stimulation) and the ordinate shows the MEP onset latency dispersion (in ms) before and after the I-wave (*upper* graphs in **B** and **D**) and control (*lower* graphs in **B** and **D**) protocol. MEP onset latency dispersions (expressed as a percentage of baseline) are shown for individual subjects for MEPs tested in the AP (I-wave protocol = red bars, control protocol = black bars) and PA (I-wave protocol = purple bars, control protocol = green bars) orientation in both groups. Error bars indicate SDs. \* $P < 0.05$ , comparison between protocols;  $^{\dagger}P < 0.05$ , comparison with baseline.

Fig. 5C and D) participants. F-wave persistence also increased in both groups {Time [ $F(4,99) = 32.6$ ,  $P < 0.001$ ], but not Group [ $F(1,99) = 2.3$ ,  $P = 0.15$ ] and in their interaction [ $F(4,99) = 1.8$ ,  $P = 0.14$ ] compared with baseline for 30 min (uninjured by  $19.2 \pm 3.3\%$  in 9/10 and SCI by  $14.9 \pm 2.9\%$  in 9/10).

### Voluntary motor output

Repeated measures ANOVA showed an effect of Protocol [ $F(1,200) = 11.8$ ,  $P = 0.001$ ], Time [ $F(4,200) = 12.4$ ,  $P < 0.001$ ], Group [ $F(1,200) = 22.6$ ,  $P < 0.001$ ] but not

in their interaction [ $F(4,200) = 0.15$ ,  $P = 0.81$ ] on index finger abduction force. Similar results were found for mean EMG in the first dorsal interosseus muscle {Protocol [ $F(1,200) = 262.3$ ,  $P < 0.001$ ], Time [ $F(4,200) = 16.5$ ,  $P < 0.001$ ], Group [ $F(1,200) = 26.3$ ,  $P < 0.001$ ] but not in their interaction [ $F(4,200) = 0.34$ ,  $P = 0.85$ ]. Index finger abduction mean force and EMG activity in the first dorsal interosseus muscle increased in uninjured (force by  $34.1 \pm 6.3\%$ , EMG by  $30.4 \pm 7.2\%$ ,  $P < 0.001$ ; Fig. 6A and C) and SCI (force by  $32.4 \pm 3.1\%$ , EMG by  $27.8 \pm 13.3\%$ ,  $P < 0.001$ ; Fig. 6D and F) participants after the I-wave protocol compared with the baseline for 30 min.

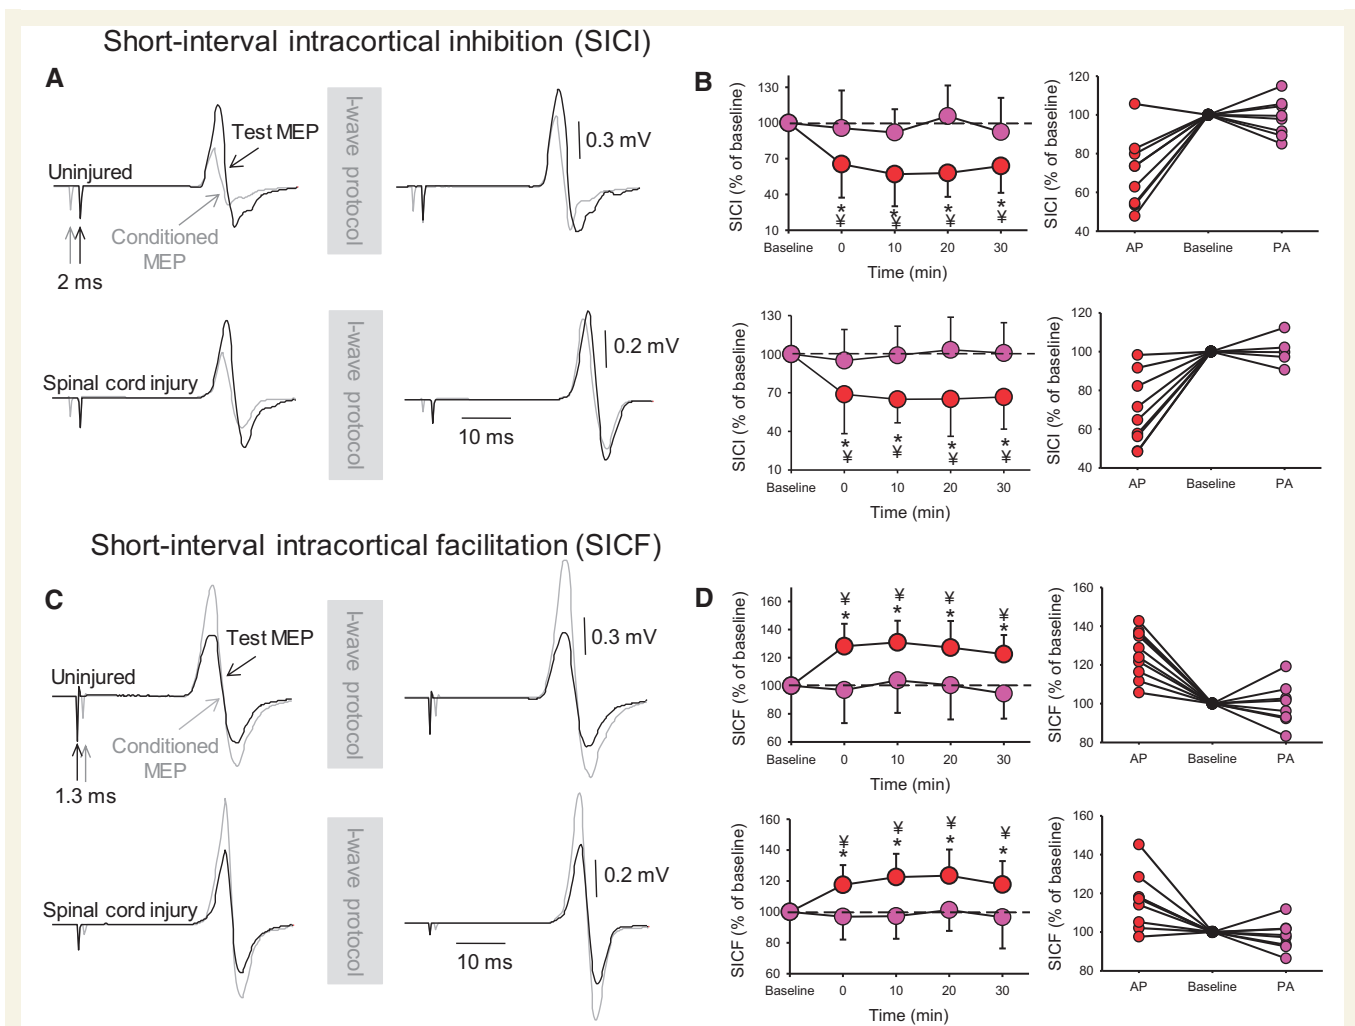

**Figure 4 Intracortical inhibition.** SICI (**A**) and SICF (**C**). Test (black traces) and conditioned (grey traces) MEPs elicited in the first dorsal interosseous muscle of a representative uninjured (*upper traces*) and SCI (*lower traces*) subject at an interstimulus interval of 2.0 ms (SICI) and 1.3 ms (SICF) with the coil positioned in the AP orientation before and after the I-wave protocol. For SICI, the conditioning stimulus is given before the test stimulus, and for SICF the conditioning stimulus is given after the test stimulus. Waveforms represent the average of 20 MEPs. Group (*left*) and individual (*right*) data are shown in graphs when SICI (**B**) and SICF (**D**) were tested with the TMS coil in the AP (red circles) and PA (purple circles) orientation. Note the decrease in SICI (reflected by a number closer to 100%, which indicates that the size of the test and conditioned MEPs are similar) and the increase in SICF (reflected as a number above 100%, which indicates that the size of the conditioned MEPs is larger than the size of the test MEP) in the AP (red circles), but not the PA (purple circles) orientation after the I-wave, in both groups. SICI and SICF values (expressed as a percentage of baseline) are shown for individual subjects when tested with the TMS coil in the AP (red circles) and PA (purple circles) orientation after the I-wave protocol. Error bars indicate SDs. \* $P < 0.05$ , comparison between protocols; † $P < 0.05$ , comparison with baseline.

However, force (uninjured,  $P = 0.85$ ; SCI,  $P = 0.46$ ) and EMG (uninjured,  $P = 0.24$ ; SCI,  $P = 0.33$ ) outcomes remained unchanged at each time point after the control protocol in both groups.

Figure 7A shows an individual with SCI completing the nine-hole peg test, which measures hand dexterity. Repeated measures ANOVA showed a significant effect of Protocol [ $F(1,99) = 6.8$ ,  $P = 0.01$ ], Time [ $F(4,99) = 10.5$ ,  $P < 0.001$ ] and in their interaction [ $F(4,99) = 3.8$ ,  $P = 0.008$ ] on the time to retrieve the pins during nine-hole peg test (Fig. 7B). Similar results were found for the

time to put back the pins {Protocol [ $F(1,99) = 24.5$ ,  $P < 0.001$ ], Time [ $F(4,99) = 10.8$ ,  $P < 0.001$ ] and in their interaction [ $F(4,99) = 8.5$ ,  $P < 0.001$ ]. Notably, we found that SCI subjects needed less time to retrieve ( $P < 0.001$ ) and put back ( $P < 0.001$ ; Fig. 7B) the pins compared with baseline after the I-wave protocol. No differences were found in the time to retrieve ( $P = 0.38$ ) and put back ( $P = 0.31$ ) the pins after the control protocol. SCI subjects also showed a decrease in reaction time (by  $11.2 \pm 4.5\%$ ,  $P < 0.001$ ) and the EMG coefficient of variation (by  $4.9 \pm 2.3\%$ ,  $P = 0.004$ ) after the I-wave protocol.



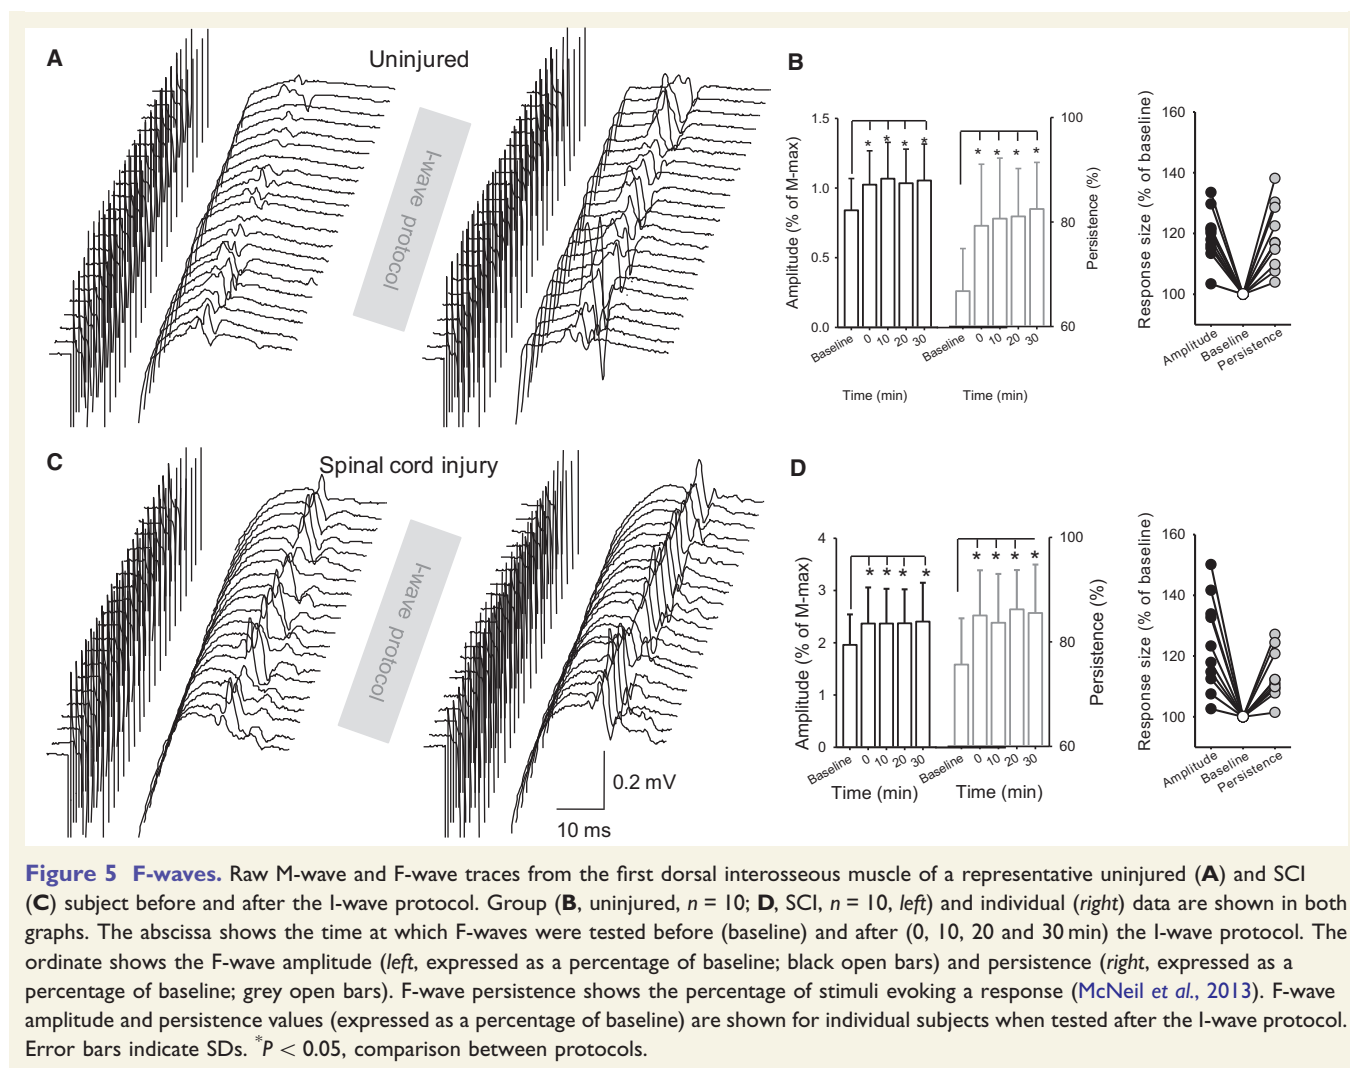

While no changes were observed after the control protocol (reaction time,  $P = 0.76$ ; EMG coefficient of variation,  $P = 0.21$ ).

## Discussion

Our novel findings indicate that late synaptic inputs to corticospinal neurons represent a novel target for improving the recovery of hand function after SCI. We found that repeated pairs of non-invasive cortical stimulation at an interstimulus interval mimicking the rhythmicity of late I-waves in corticospinal volleys enhanced corticospinal transmission and hand voluntary motor output in humans with and without SCI. Intracortical inhibition decreased and F-waves amplitude and persistence increased after the I-wave protocol, highlighting that the motor cortex and the spinal cord might have contributed to the after-effects of this form of stimulation. Repeated stimulation at an interstimulus interval in-between I-waves did not change physiological and behavioural outcomes. We propose that cortical

synaptic inputs may represent a novel therapeutic target to enhance motor recovery following chronic incomplete cervical SCI.

## A cortical target for promoting motor recovery following SCI

During the past decade, several neuromodulatory strategies have been used to enhance motor function in individuals with SCI. For example, studies have used electrical stimulation of the spinal cord (Gerasimenko *et al.*, 2007; Harkema *et al.*, 2011; Angeli *et al.*, 2014), operant conditioning of spinal reflexes (Thompson *et al.*, 2013), paired corticospinal-motor neuronal stimulation (Bunday and Perez, 2012), and stimulation of the motor cortex (Tazoe and Perez, 2015), with and without training, to improve motor output and other related functions. However, note that in individuals with a clinical diagnosis of complete SCI, invasive epidural electrical stimulation of the lumbosacral spinal cord needs to be combined with extensive periods of training and with the aid of electrical stimulation

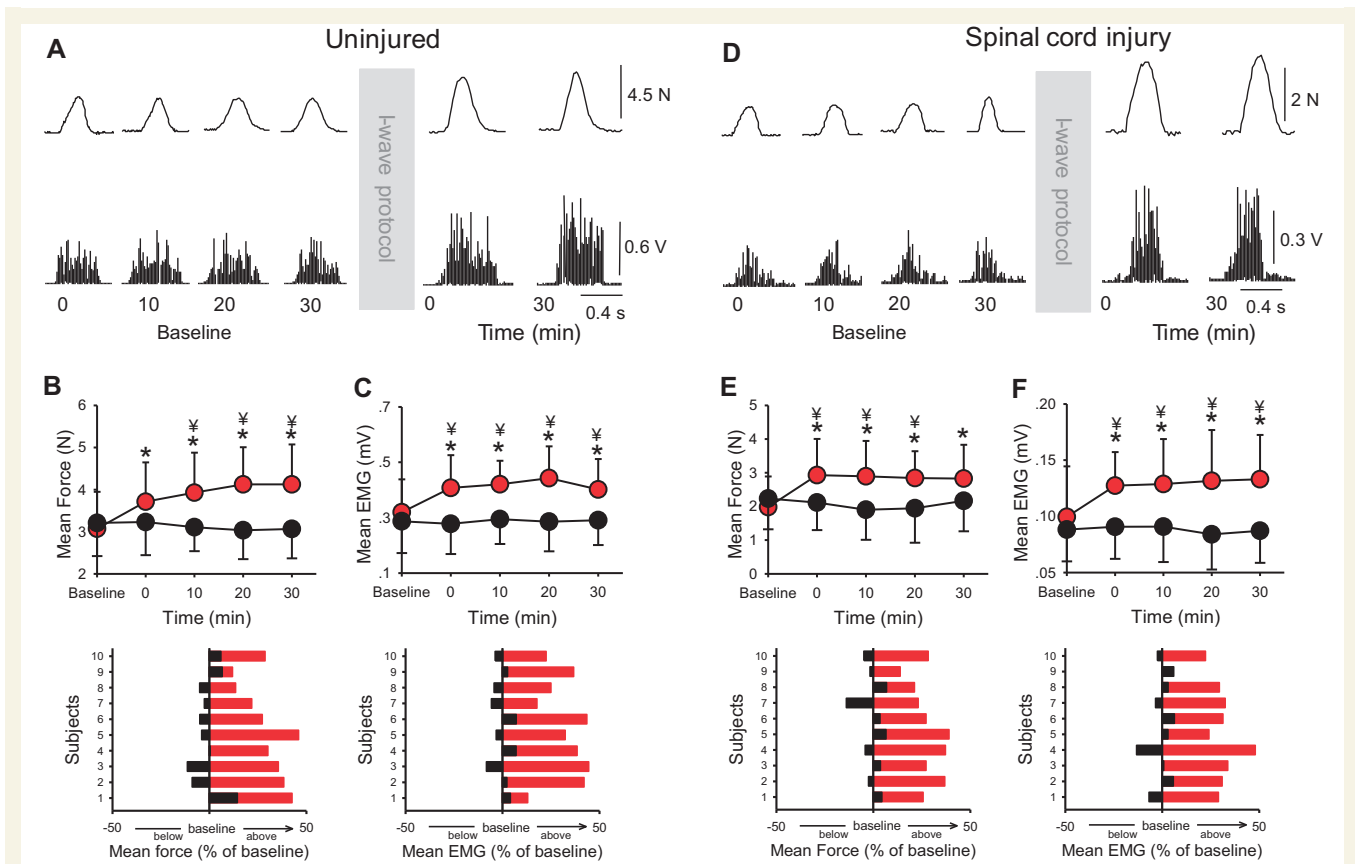

**Figure 6 Voluntary motor output.** Force into index finger abduction (*upper*) and EMG (*lower*) raw traces from the first dorsal interosseous muscle during brief, fast, index finger voluntary contractions in the abduction direction before (baseline) and after (0, 10, 20, and 30 min) the I-wave protocol from a representative uninjured (**A**) and SCI (**D**) subject. Waveforms represent the average of 20 force and EMG traces. Group data (uninjured,  $n = 10$ ; SCI,  $n = 10$ ) shows force (**B**, uninjured and **E**, SCI) and mean rectified EMG activity (**C**, uninjured and **F**, SCI) after the I-wave (red circles) and control (black circles) protocol. Force and EMG activity values (expressed as a percentage of baseline) are shown for individual subjects when tested after the I-wave (red bars) and control (black bars) protocol. Error bars indicate SDs. \* $P < 0.05$ , comparison between protocols;  $^{\dagger}P < 0.05$ , comparison with baseline.

to result in beneficial behavioural effects (Harkema *et al.*, 2011; Angeli *et al.*, 2014). Also, the beneficial after-effects of non-invasive transcutaneous electrical stimulation of the lumbar spine in humans with complete SCI are mostly evoked in antigravity positions and do not translate yet to independent motor behaviours (Gerasimenko *et al.*, 2007; Tator *et al.*, 2012). Paired corticospinal-motor neuronal stimulation relies on the synchronized arrival of corticospinal descending volleys and antidromic volleys from the periphery at the spinal cord (Bunday and Perez, 2012), while operant conditioning of spinal reflexes is prevented by ablation of the corticospinal tract (Chen *et al.*, 2002) and/or the sensorimotor cortex (Chen *et al.*, 2006). Repetitive TMS over motor cortex has resulted in variable results (Tazoe and Perez, 2015). Thus, neuromodulatory strategies for improving motor recovery after SCI still have constraints and result in limited functional outcomes, highlighting the need for additional targets to strengthen transmission in spared neural networks.

We report a new strategy that mimics the rhythmicity of descending late cortical volleys as a mechanism for strengthening motor recovery in humans with chronic incomplete cervical SCI. Epidural recordings from the spinal cord in humans showed that a single TMS pulse over the motor cortex elicits a series of late I-waves with peaks  $\sim 4$ – $5$  ms after the stimulus artefact (Di Lazzaro *et al.*, 2012). Paired-pulse TMS paradigms using interstimulus intervals of  $\sim 4$ – $5$  ms have been used to make inferences about the physiology of late I-waves from surface EMG recordings in individuals with (Cirillo *et al.*, 2016) and without (Tokimura *et al.*, 1996; Ziemann *et al.*, 1998a) SCI. Several of our results support the view that we were able to preferentially target volleys with characteristics resembling late I-waves in corticospinal neurons during our I-wave protocol. First, we found that the size of MEPs elicited with the coil in the AP, but not in the PA, orientation increased for  $\sim 30$  to 60 min. TMS-induced electric currents flowing in the PA orientation across the central

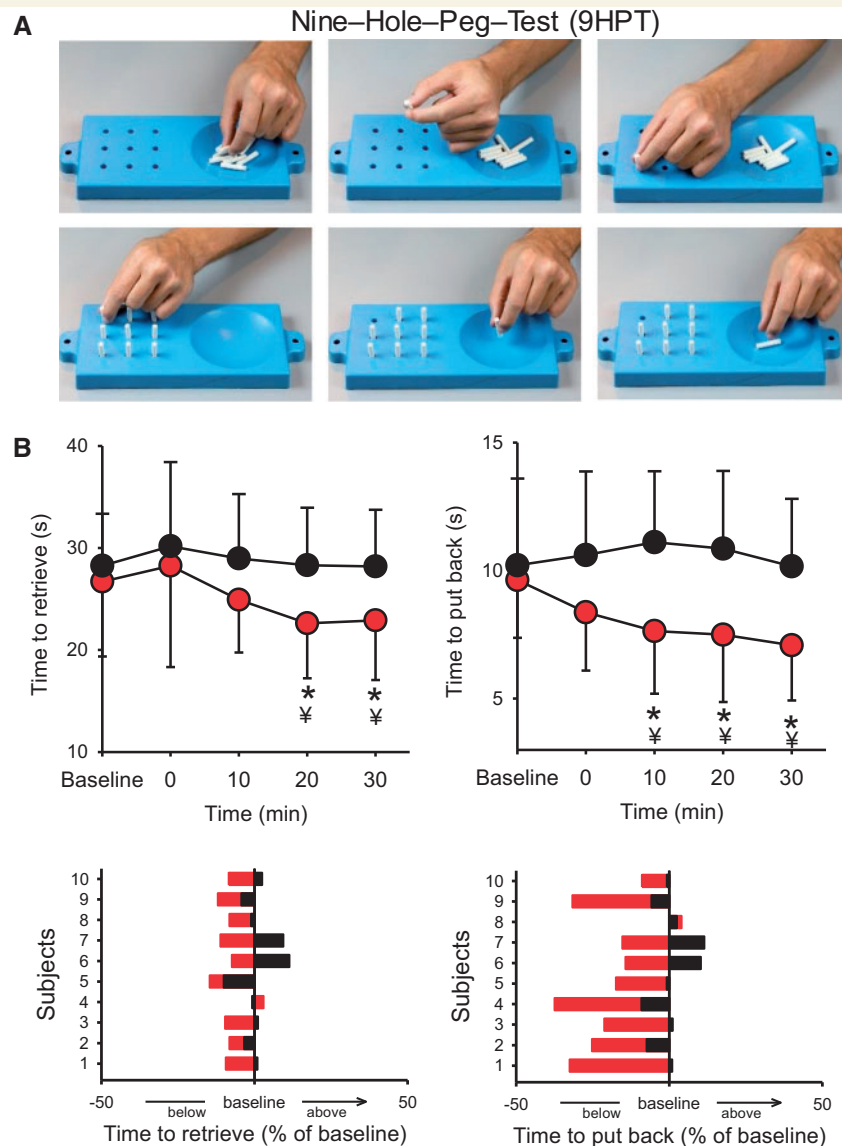

**Figure 7** Nine-hole peg test. Manual dexterity was assessed by examining changes in the speed to complete the nine-hole peg test before (baseline) and after (0, 10, 20, and 30 min) the I-wave protocol in participants with SCI. **(A)** Individual images showing the steps to complete the nine-hole peg test. Note that the *top* row shows the part of the test where each pin is lifted by a precision grip between the index and thumb and deposited into the reservoir located on the side, while the *bottom* row shows that each pin is pick up and repositioned back into each hole by a precision grip between the index and thumb (Subject 7 on Table 1). **(B)** Graph shows group (*upper*) and individual (*lower*) data in a participant with SCI ( $n = 10$ ). The abscissa shows the time of measurements, and the ordinate shows the time to complete the test (in ms) before and after the I-wave (red circles) and control (black circles) protocol. Time to retrieve and replace the pins (expressed as a percentage of baseline) are shown for individual subjects after the I-wave (red bars) and control (black bars) protocol. Error bars indicate SDs. \* $P < 0.05$ , comparison between protocols; † $P < 0.05$ , comparison with baseline.

sulcus preferentially evoke highly synchronized corticospinal activity resembling early I-waves whereas currents flowing in the AP orientation evoke less synchronized delayed corticospinal activity resembling late I-waves (Patton and Amassian, 1954; Sakai *et al.*, 1997; Di Lazzaro *et al.*, 2012; Federico and Perez, 2016). Second, we found that SICI, measured by a paired-pulse TMS paradigm using an interstimulus interval of 2 ms decreased after the I-wave protocol in both groups of subjects. Evidence

from epidural recordings of descending volleys from the spinal cord and pharmacological studies in humans suggests that changes in SICI relates to activation of  $\gamma$ -aminobutyric acid (GABA) inhibitory circuits in the motor cortex (Di Lazzaro *et al.*, 2000). SICI-related cortical interneurons are also thought to overlap with cortical circuits contributing to the generation of late I-waves (Di Lazzaro *et al.*, 2012). Thus, the decrease in SICI after the I-wave protocol suggests that the motor cortex is a possible site that could

have contributed to our results. This also agrees with findings showing that individuals with SCI retain the ability to modulate intracortical inhibition in a task-dependent manner to a similar extent as control subjects (Barry *et al.*, 2013; Bunday *et al.*, 2014). Third, we found that SICF, another paired-pulse TMS paradigm used to make inferences about intracortical inhibition, increased after the I-wave protocol in both groups. Studies using epidural recordings (Di Lazzaro *et al.*, 1999) and pharmacology (Ziemann *et al.*, 1998b) suggested that changes in SICF are related to activation of GABA inhibitory circuits in the motor cortex. SICF at the interstimulus interval measured in our study likely reflects summation of late I-wave inputs (Sakai *et al.*, 1997; Di Lazzaro *et al.*, 2012). Thus, a possible interpretation of our results is that the efficacy of less synchronized AP synaptic inputs, which were preferentially targeted by the I-wave protocol, was potentiated after the stimulation. Another possible interpretation is that our results reflect contributions from other brain areas. AP latencies correlate with functional connectivity between motor cortex and frontal areas (Volz *et al.*, 2014) and brain reorganization after SCI has been shown to be present in a distributed network of motor-related cortical areas (Isa and Nishimura, 2014). Multiple descending motor pathways might contribute to the recovery of hand function after SCI. Indeed, previous data support the view that finger muscles are controlled cooperatively by both corticospinal and reticulospinal pathways after SCI (Baker, 2011; Baker and Perez, 2017). Also, MEP responses tested in our study likely involve an early component by direct activation of the motor neurons by corticospinal neurons and late components due to indirect activation through excitatory inputs from the brainstem and/or spinal cord (Petersen *et al.*, 2010). Thus, it is possible that all these factors influenced our results.

It could also be argued that the activity in spinal cord circuits contributed to our findings as we found that the amplitude and persistence of F-waves increased after the I-wave protocol in both groups of subjects. This is consistent with results showing that late I-waves evoked by TMS receive contributions from subcortical networks (Cirillo and Perez, 2015). It also agrees with evidence showing that late I-waves, measured by TMS, make a crucial contribution to the motor neuron recruitment in SCI and uninjured subjects (Cirillo *et al.*, 2016). A critical question is how repeated activation of late cortical synaptic inputs to corticospinal neurons changed the excitability of spinal motor neurons? A possibility is that better synchronized late corticospinal volleys travelling to spinal motor neurons contributed to this outcome. This is supported by the reduced onset latency dispersion for MEPs tested in the AP but not in the PA orientation in both groups. Corticospinal axons undergo demyelination and progressive atrophy near to and further away from the injury epicentre following SCI (Oudega and Perez, 2012). Reaction times in response to a signal to move are prolonged in subjects with SCI compared with uninjured individuals (Federico and Perez,

2017) and prolonged reaction times in SCI subjects have been related to an altered ability to synchronize corticospinal descending volleys at the spinal cord (Cirillo *et al.*, 2016). This might reflect a longer time needed to raise spinal motor neurons to threshold because of the altered descending drive after the injury. Indeed, spinal motor neurons of subjects with chronic SCI are activated by longer periods of depolarization compared with uninjured subjects (Norton *et al.*, 2008). Note that the latency of excitatory postsynaptic potentials on motor neurons shows a direct relation with the latencies of I-waves (Kernell and Chien-Ping, 1967). Altogether, these factors might contribute to changes in EMG and force outcomes exerted during ballistic index finger voluntary contractions after the I-wave protocol.

## Functional considerations

Although we did not record directly from synaptic connections to corticospinal neurons, the specificity of our results support the view that cortical circuits were successfully targeted to facilitate voluntary motor output following chronic SCI. This is important because this site may represent a target that is less affected by the hostility of the injury environment (Oudega and Perez, 2012) and agrees with evidence suggesting that late I-wave synaptic inputs are important to enhance plasticity and motor learning (Hamada *et al.*, 2013, 2014). Studies using other types of targeted plasticity found that some of the beneficial effects of the stimulation on behavioural outcomes can be present a few minutes after the stimulation (Taylor and Martin, 2009; Bunday and Perez, 2012), which might be related to the time when physiological effects are stronger (Taylor and Martin, 2009). In agreement, we found that the group of SCI participants that performed the nine-hole peg test showed larger changes in MEP size and hand dexterity at similar times after the stimulation.

It is difficult to compare the I-wave protocol to other stimulation paradigms resulting in plasticity. The interval between pairs of stimuli used in the I-wave protocol is shorter than what has been used in theta burst stimulation in humans (Huang *et al.*, 2005) and longer than what has been used for sensorimotor cortex stimulation in rodents (Carmel *et al.*, 2010, 2013). There are also differences in the arrangement of trains of stimuli, duration, and other stimulation parameters. I-waves have been recorded in the pyramidal tract in rodents after electrical stimulation (Ohta and Tashiro, 1968), which likely activates the corticospinal axon directly while I-waves tested here in humans are thought to arise from trans-synaptic cortical inputs. Regardless of these differences, our results extend previous findings and demonstrate for the first time that an approach that mimics the rhythmicity of late cortical synaptic inputs on corticospinal neurons represents a strategy to promote motor recovery of hand function following human SCI.



## Funding

National Institute of Neurological Disorders and Stroke. Grant Numbers: R01NS076589, R01 NS090622. Department of Veterans Affairs. Grant Number: I01RX000815, I01RX001807.

## Supplementary material

Supplementary material is available at *Brain* online.

## References

- Angeli CA, Edgerton VR, Gerasimenko YP, Harkema SJ. Altering spinal cord excitability enables voluntary movements after chronic complete paralysis in humans. *Brain* 2014; 137 (Pt 5): 1394–409.
- Baker SN. The primate reticulospinal tract, hand function and functional recovery. *J Physiol* 2011; 589: 5603–12.
- Baker SN, Perez MA. Reticulospinal contributions to gross hand function after human spinal cord injury. *J Neuroscience* 2017, in press.
- Barry MD, Bunday KL, Chen R, Perez MA. Selective effects of baclofen on use-dependent modulation of GABAB inhibition after tetra-plegia. *J Neurosci* 2013; 33: 12898–907.
- Bunday KL, Perez MA. Motor recovery after spinal cord injury enhanced by strengthening corticospinal synaptic transmission. *Curr Biol* 2012; 22: 2355–61.
- Bunday KL, Tazoe T, Rothwell JC, Perez MA. Subcortical control of precision grip after human spinal cord injury. *J Neurosci* 2014; 34: 7341–50.
- Butler JE, Thomas CK. Effects of sustained stimulation on the excitability of motoneurons innervating paralyzed and control muscles. *J Appl Physiol* 2003; 94: 567–75.
- Carmel JB, Berrol LJ, Brus-Ramer M, Martin JH. Chronic electrical stimulation of the intact corticospinal system after unilateral injury restores skilled locomotor control and promotes spinal axon outgrowth. *J Neurosci* 2010; 30: 10918–26.
- Carmel JB, Kimura H, Berrol LJ, Martin JH. Motor cortex electrical stimulation promotes axon outgrowth to brain stem and spinal targets that control the forelimb impaired by unilateral corticospinal injury. *Eur J Neurosci* 2013; 37: 1090–102.
- Cirillo J, Calabro FJ, Perez MA. Impaired organization of paired-pulse TMS-induced I-waves after human spinal cord injury. *Cereb Cortex* 2016; 26: 2167–77.
- Cirillo J, Perez MA. Subcortical contribution to late TMS-induced I-waves in intact humans. *Front Integr Neurosci* 2015; 9: 38.
- Chen XY, Carp JS, Chen L, Wolpaw JR. Corticospinal tract transection prevents operantly conditioned H-reflex increase in rats. *Exp Brain Res* 2002; 144: 88–94.
- Chen XY, Carp JS, Chen L, Wolpaw JR. Sensorimotor cortex ablation prevents H-reflex up-conditioning and causes a paradoxical response to down-conditioning in rats. *J Neurophysiol* 2006; 96: 119–27.
- Di Lazzaro V, Rothwell JC. Corticospinal activity evoked and modulated by non-invasive stimulation of the intact human motor cortex. *J Physiol* 2014; 592: 4115–28.
- Di Lazzaro V, Profice P, Ranieri F, Capone F, Dileone M, Oliviero A, et al. I-wave origin and modulation. *Brain Stimul* 2012; 5: 512–25.
- Di Lazzaro V, Ziemann U, Lemon R. State of the art: physiology of transcranial motor cortex stimulation. *Brain Stimul* 2008; 1: 345–62.
- Di Lazzaro V, Oliviero A, Meglio M, Cioni B, Tamburrini G, Tonali P, et al. Direct demonstration of the effect of lorazepam on the excitability of the human motor cortex. *Clin Neurophysiol* 2000; 111: 794–49.
- Di Lazzaro V, Rothwell JC, Oliviero A, Profice P, Insola A, Mazzone P, et al. Intracortical origin of the short latency facilitation produced by pairs of threshold magnetic stimuli applied to human motor cortex. *Exp Brain Res* 1999; 129: 494–9.
- Federico P, Perez MA. Distinct cortico-cortical contributions to human precision and power grip. *Cereb Cortex* 2016; in press.
- Federico P, Perez MA. Altered corticospinal function during movement preparation in humans with spinal cord injury. *J Physiology* 2017; 595: 233–45.
- Gerasimenko YP, Ichiyama RM, Lavrov IA, Courtine G, Cai L, Zhong H, et al. Epidural spinal cord stimulation plus quipazine administration enable stepping in complete spinal adult rats. *J Neurophysiol* 2007; 98: 2525–36.
- Ghosh A, Haiss F, Sydekum E, Schneider R, Gullo M, Wyss MT, et al. Rewiring of hindlimb corticospinal neurons after spinal cord injury. *Nat Neurosci* 2010; 13: 97–104.
- Graziano MS, Aflalo TN. Mapping behavioral repertoire onto the cortex. *Neuron* 2007; 56: 239–51.
- Hamada M, Murase N, Hasan A, Balaratnam M, Rothwell JC. The role of interneuron networks in driving human motor cortex plasticity. *J Neurosci* 2013; 23: 1593–605.
- Hamada M, Galea JM, Di Lazzaro V, Mazzone P, Ziemann U, Rothwell JC. Two distinct interneuron circuits in human motor cortex are linked to different subsets of physiological and behavioral plasticity. *J Neurosci* 2014; 34: 12837–49.
- Harkema S, Gerasimenko Y, Hodes J, Burdick J, Angeli C, Chen Y, et al. Effect of epidural stimulation of the lumbosacral spinal cord on voluntary movement, standing, and assisted stepping after motor complete paraplegia: a case study. *Lancet* 2011; 377: 1938–47.
- Huang YZ, Edwards MJ, Rounis E, Bhatia KP, Rothwell JC. Theta burst stimulation of the human motor cortex. *Neuron* 2005; 45: 201–6.
- Isa T, Nishimura Y. Plasticity for recovery after partial spinal cord injury—hierarchical organization. *Neurosci Res* 2014; 78: 3–8.
- Kernell D, Chien-Ping W. Post-synaptic effects of cortical stimulation on forelimb motoneurons in the baboon. *J Physiol* 1967; 191: 673–90.
- Kim BG, Dai HN, McAtee M, Vicini S, Bregman BS. Remodeling of synaptic structures in the motor cortex following spinal cord injury. *Exp Neurol* 2006; 198: 401–15.
- Kujirai T, Caramia MD, Rothwell JC, Day BL, Thompson PD, Ferbert A, et al. Corticocortical inhibition in human motor cortex. *J Physiol* 1993; 471: 501–19.
- McNeil CJ, Butler JE, Taylor JL, Gandevia SC. Testing the excitability of human motoneurons. *Front Hum Neurosci* 2013; 24: 152.
- Moxon KA, Oliviero A, Aguilar J, Foffani G. Cortical reorganization after spinal cord injury: always for good? *Neuroscience* 2014; 26: 78–94.
- Nardone R, Höller Y, Bathke AC, Orioli A, Schwenker K, Frey V, et al. Spinal cord injury affects I-wave facilitation in human motor cortex. *Brain Res Bull* 2015; 116: 93–7.
- Norton JA, Bennett DJ, Knash ME, Murray KC, Gorassini MA. Changes in sensory-evoked synaptic activation of motoneurons after spinal cord injury in man. *Brain* 2008; 131 (Pt 6): 1478–91.
- Ohta M, Tashiro N. Pyramidal tract response to cortical stimulation in the rat. *Jpn J Physiol* 1968; 18: 432–45.
- Oudega M, Perez MA. Corticospinal reorganization after spinal cord injury. *J Physiol* 2012; 590: 3647–63.
- Patton HD, Amassian VE. Single and multiple-unit analysis of cortical stage of pyramidal tract activation. *J Neurophysiol* 1954; 17: 345–63.
- Paulus W, Classen J, Cohen LG, Large CH, Di Lazzaro V, Nitsche M, et al. State of the art: pharmacologic effects on cortical excitability measures tested by transcranial magnetic stimulation. *Brain Stimul* 2008; 1: 151–63.
- Petersen NC, Butler JE, Taylor JL, Gandevia SC. Probing the corticospinal link between the motor cortex and motoneurons: some neglected aspects of human motor cortical function. *Acta Physiol* 2010; 198: 403–16.

- Ridding MC, Rothwell JC. Is there a future for therapeutic use of transcranial magnetic stimulation?. *Nat Rev Neurosci* 2007; 8: 559–67.
- Sanes JN, Donoghue JP. Plasticity and primary motor cortex. *Annu Rev Neurosci* 2000; 23: 393–415.
- Sakai K, Ugawa Y, Terao Y, Hanajima R, Furubayashi T, Kanazawa I. Preferential activation of different I waves by transcranial magnetic stimulation with a figure-of-eight-shaped coil. *Exp Brain Res* 1997; 113: 24–32.
- Tator CH, Minassian K, Mushahwar VK. Spinal cord stimulation: therapeutic benefits and movement generation after spinal cord injury. *Handb Clin Neurol* 2012; 109: 283–96.
- Taylor JL, Martin PG. Voluntary motor output is altered by spike-timing-dependent changes in the human corticospinal pathway. *J Neurosci* 2009; 29: 11708–16.
- Tazoe T, Perez MA. Effects of repetitive transcranial magnetic stimulation on recovery of function after spinal cord injury. *Arch Phys Med Rehabil* 2015; 96 (Suppl 4): S145–55.
- Thickbroom GW, Byrnes ML, Edwards DJ, Mastaglia FL. Repetitive paired-pulse TMS at I-wave periodicity markedly increases corticospinal excitability: a new technique for modulating synaptic plasticity. *Clin Neurophysiol* 2006; 117: 61–6.
- Thompson AK, Pomerantz FR, Wolpaw JR. Operant conditioning of a spinal reflex can improve locomotion after spinal cord injury in humans. *J Neurosci* 2013; 33: 2365–75.
- Tokimura H, Ridding MC, Tokimura Y, Amassian VE, Rothwell JC. Short latency facilitation between pairs of threshold magnetic stimuli applied to human motor cortex. *Electroencephalogr Clin Neurophysiol* 1996; 101: 263–72.
- Volz LJ, Hamada M, Rothwell JC, Grefkes C. What makes the muscle twitch: motor system connectivity and TMS-induced activity. *Cereb Cortex* 2014; 25: 2346–53.
- Ziemann U, Tergau F, Wassermann EM, Wischer S, Hildebrandt J, Paulus W. Demonstration of facilitatory I wave interaction in the human motor cortex by paired transcranial magnetic stimulation. *J Physiol* 1998a; 511: 181–90.
- Ziemann U, Tergau F, Wischer S, Hildebrandt J, Paulus W. Pharmacological control of facilitatory I-wave interaction in the human motor cortex: a paired transcranial magnetic stimulation study. *Electroencephalogr Clin Neurophysiol* 1998b; 109: 321–30.
